# Supplementary material for: Terephthalaldehyde as a good crosslinking agent in crosslinked chitosan hydrogel for the selective removal of anionic dyes
Source: Royal Society of Chemistry journal article supplement (doi:10.1039/d0nj05758d), 2021-01-01
Supplement: d0nj05758d1.pdf [file d0nj05758d1.pdf]

## Terephthalaldehyde as better crosslinking agent in crosslinked chitosan hydrogel for selective removal of anionic dyes

Madhvi Garg<sup>a</sup>, Navneet Bhullar<sup>b</sup>, Bharat Bajaj<sup>\*c</sup>, Dhiraj Sud<sup>a</sup>

New Journal of Chemistry

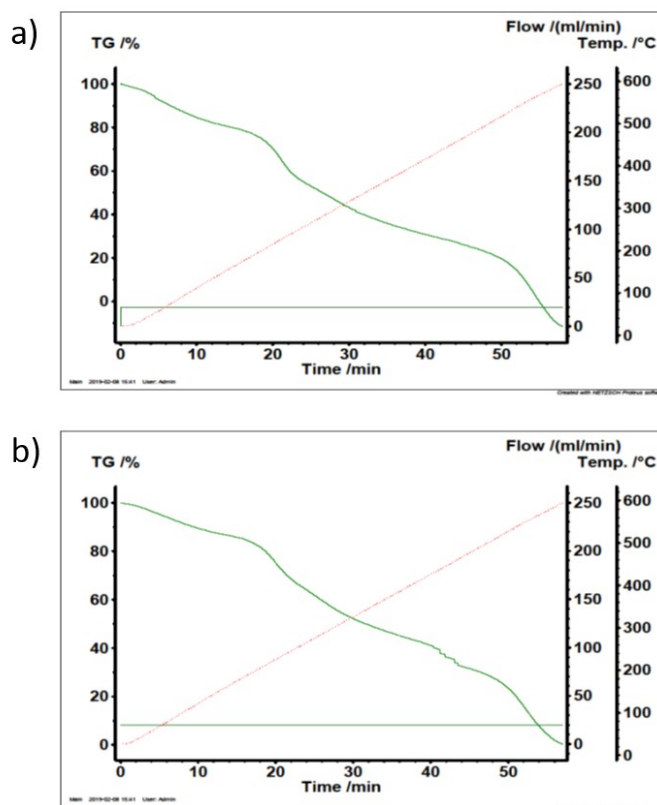

Figure S1 TGA curves of a) CAAT b) CAAG
